# Supplementary figures and images for: Viscoelastic properties of suspended cells measured with shear flow deformation cytometry
Source: eLife journal article supplement (doi:10.7554/elife.78823), 2022-09-02

soft

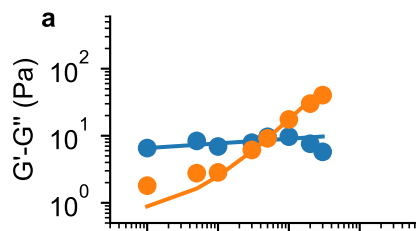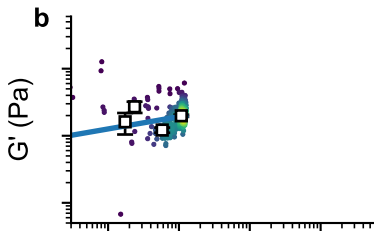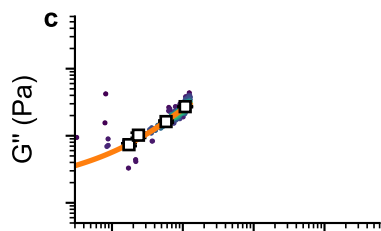

medium

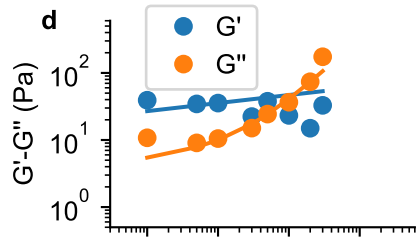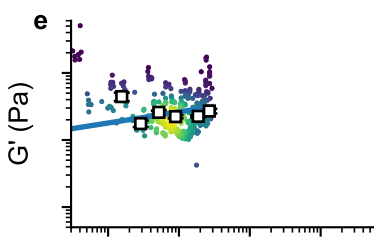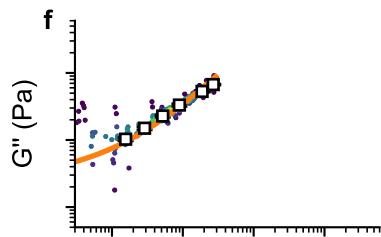

stiff

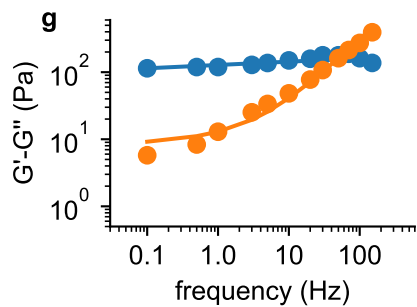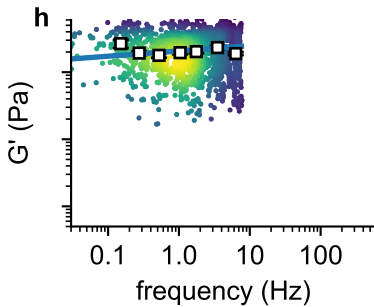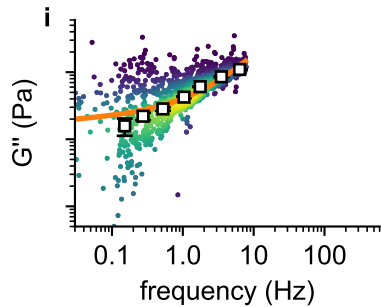

Supplement: supp [file elife-78823-supp-v1.zip]

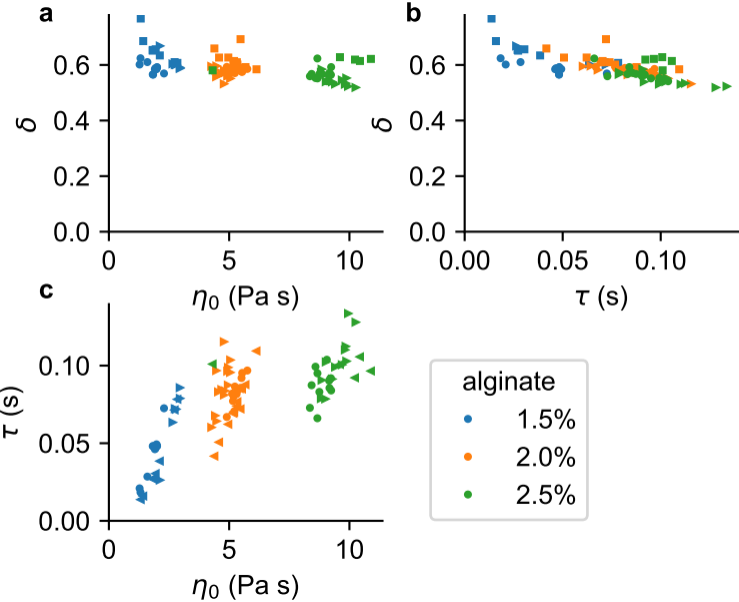

Supplement: supp [file elife-78823-supp-v1.zip]

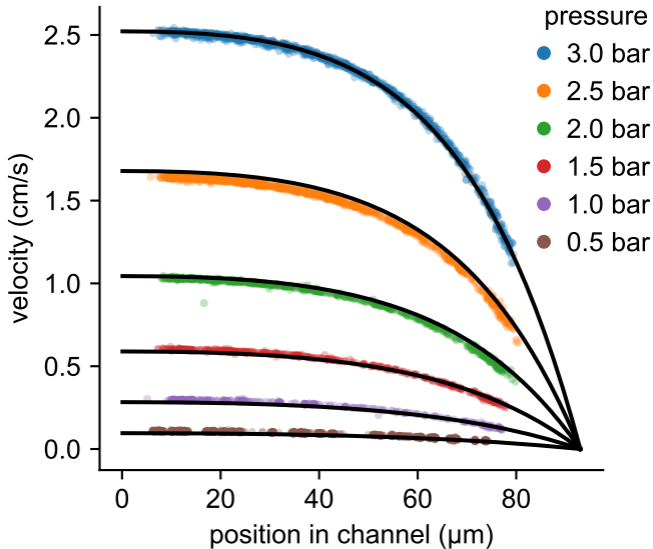

Supplement: supp [file elife-78823-supp-v1.zip]

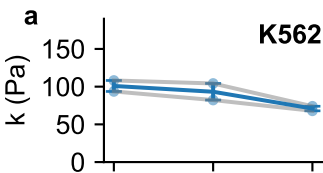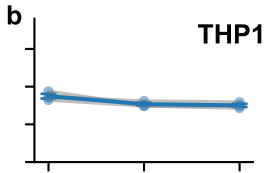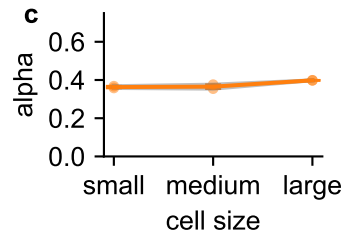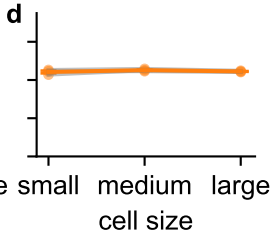

Supplement: supp [file elife-78823-supp-v1.zip]
